# Supplementary material
Source: PubMed Central journal article supplement (PMC11488644)
Supplement: NIHMS2010143-supplement-Supplement.pdf [file NIHMS2010143-supplement-Supplement.pdf]

## Supplemental Appendix Table of Contents

|                                                                                                                                                      | <b>Page Number</b> |
|------------------------------------------------------------------------------------------------------------------------------------------------------|--------------------|
| <b>Supplemental Methods</b>                                                                                                                          | <b>2</b>           |
| <b>Figure S1: Progression-Free Survival by Age Subgroup in Modified Intent-to-treat Analysis Set (70% information fraction)</b>                      | <b>3</b>           |
| <b>Figure S2: Event-Free Survival (stratified) in Modified Intent-to-treat Analysis Set (70% information fraction)</b>                               | <b>5</b>           |
| <b>Table S1: Disposition of Patients by Arm in Modified Intent-to-treat Analysis Set</b>                                                             | <b>6</b>           |
| <b>Table S2: Per Protocol End-of-Treatment Radiation in Modified Intent-to-treat Analysis Set</b>                                                    | <b>7</b>           |
| <b>Table S3: End-of-treatment Metabolic Response by Arm in Modified Intent-to-treat Analysis Set</b>                                                 | <b>8</b>           |
| <b>Table S4: Types of Event-Free Survival Event by Arm in Modified Intent-to-treat Analysis Set</b>                                                  | <b>9</b>           |
| <b>Table S5: Causes of Death by Arm in Modified Intent-to-treat Analysis Set</b>                                                                     | <b>10</b>          |
| <b>Table S6: Number of Deaths by Arm and Age Strata in Modified Intent-to-treat Analysis Set</b>                                                     | <b>11</b>          |
| <b>Table S7: Complete Listing of All Adverse Events at Least Possibly Related to Study Treatment by Arm in Modified Intent-to-treat Analysis Set</b> | <b>12</b>          |
| <b>Table S8: Grade <math>\geq 3</math> Adverse Events by Arm (<math>\geq 3\%</math> of patients) by Arm in Modified Intent-to-treat Analysis Set</b> | <b>19</b>          |
| <b>Table S9: Possible Immune-Related Adverse Events by Arm in Modified Intent-to-Treat Analysis Set</b>                                              | <b>20</b>          |
| <b>Table S10: Representativeness of Trial Population</b>                                                                                             | <b>21</b>          |

## **Supplemental Methods**

### **Statistical Analysis of PFS and OS**

Analysis of PFS and OS followed protocol specified definitions and journal policies. The primary endpoint was PFS, defined as the date of randomization to the first observation of progressive disease or death due to any cause as reported by sites. Patients last known to be alive and without report of progression were censored at last date of contact. Key secondary endpoints included the incidence of adverse events, OS – defined as the time from date of randomization to death due to any cause.

The primary analysis of PFS used a stratified log rank test statistic and is reported as two-sided test. Stratified Cox regression was used to estimate treatment hazard ratios for treatment effect. For both the primary endpoint (PFS) and secondary endpoint (OS), 95% two-sided intervals are reported. The Kaplan-Meier method was used to estimate PFS and OS curves. Assessment of proportional hazards was based on Grambsch and Therneau (1994)<sup>1</sup> in the context of the cure rate model assumed for treatment effect.

Forest plots for PFS did not include a provision for correction for multiplicity. Corresponding hazard ratios are presented with 95% confidence intervals on the basis of univariate Cox regression without adjustment for multiplicity; thus, the intervals should not be used in place of a subgroup hypothesis test.

Because the study protocol did not include a provision for correcting for multiplicity when conducting tests for secondary endpoints or in subgroups, results are reported as point estimates and 95% confidence intervals. The widths of the confidence intervals have not been adjusted for multiplicity and should not be used in place of a hypothesis test.

**Figure S1: Progression-Free Survival by Age Subgroup in Modified Intent-to-treat Analysis Set (70% information fraction).**

Panel (A) displays PFS in patients ages 12-17 years old, Panel (B) displays PFS in patients ages 18-60 years old, and Panel (C) displays PFS in patients older than 60 years old.

**(A)**

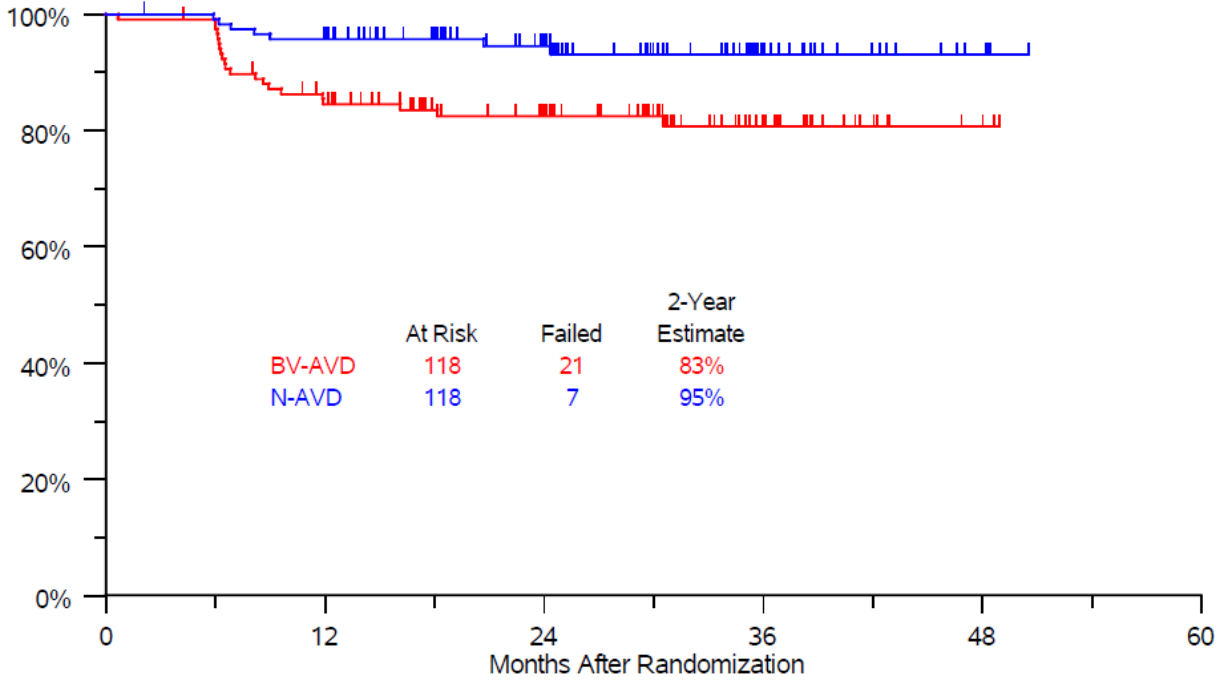

**(B)**

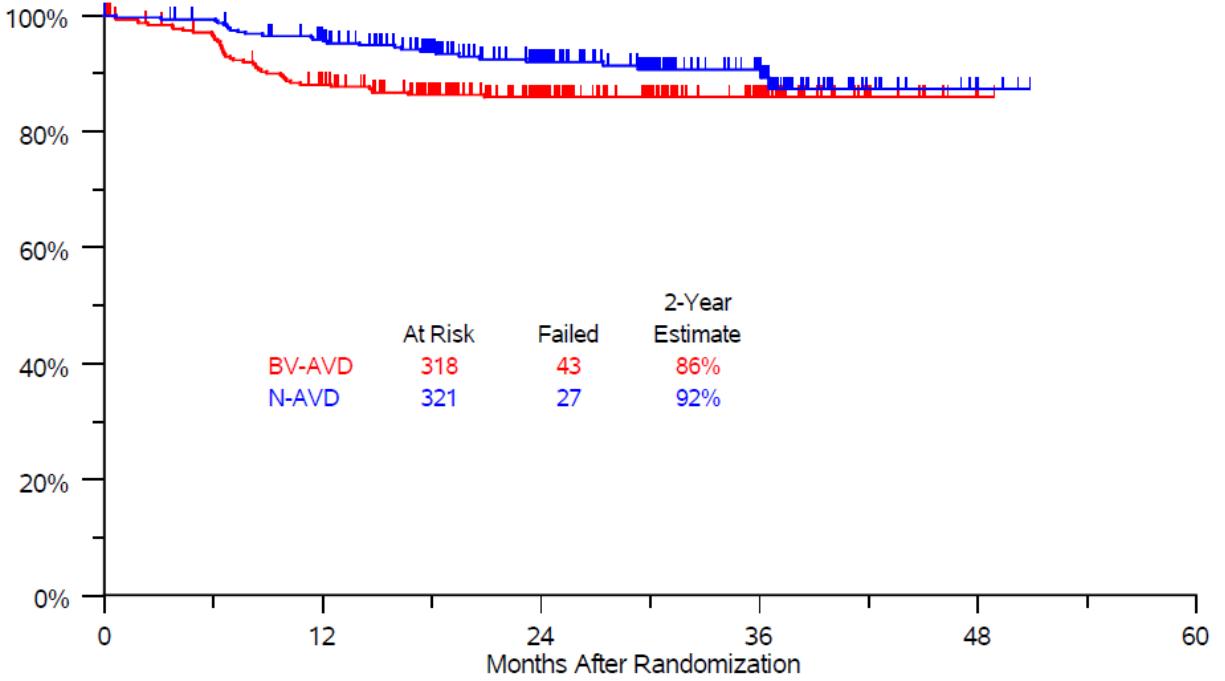

**(C)**

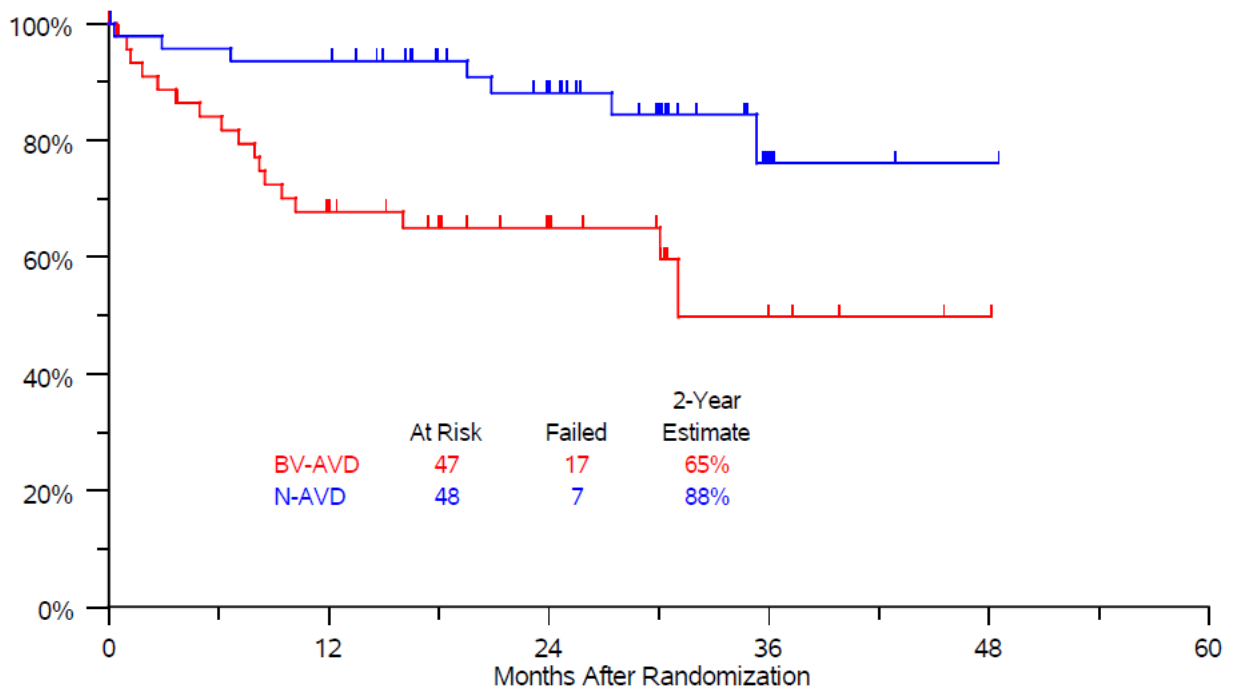

**Figure S2: Event-Free Survival (stratified) in Modified Intent-to-treat Analysis Set**

EFS displayed by arm with a median follow-up of 2.1 years.

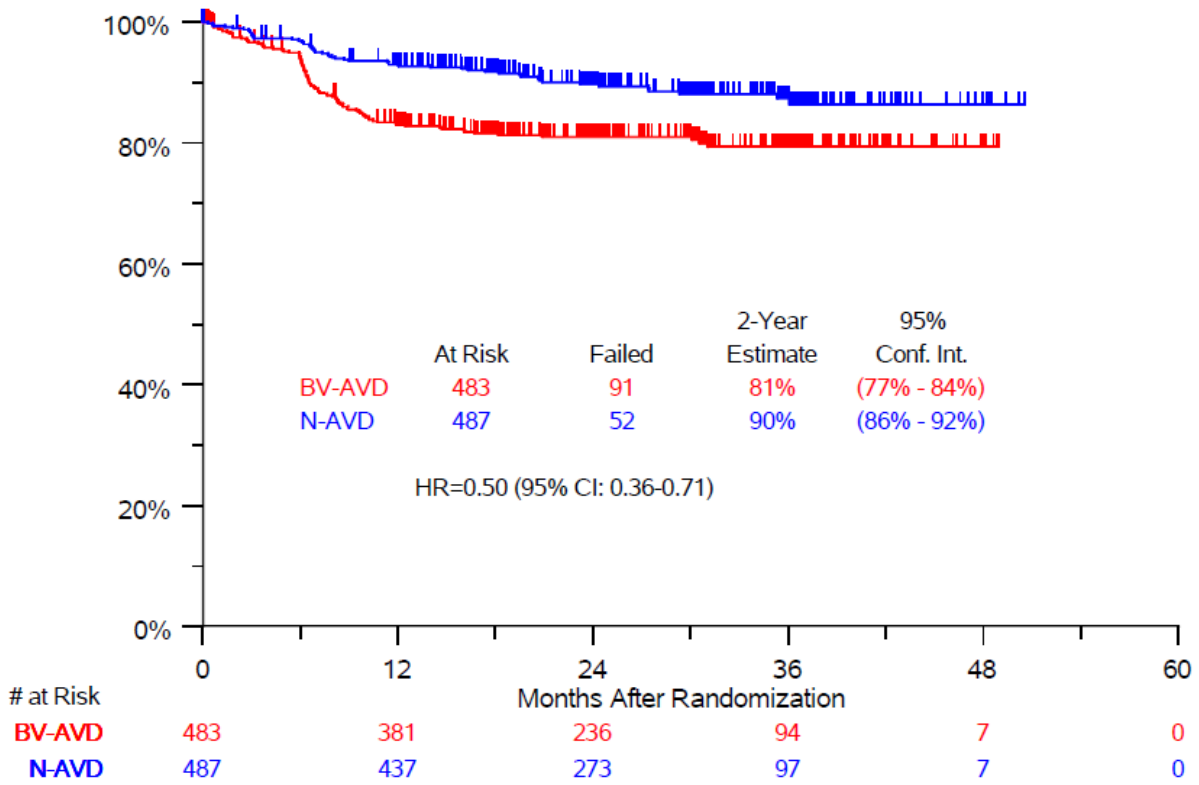

**Table S1: Disposition of Patients by Arm in in Modified Intent-to-treat Analysis Set**

|                                                              | Total    |        | Nivolumab + AVD |        | Brentuximab Vedotin + AVD |        |
|--------------------------------------------------------------|----------|--------|-----------------|--------|---------------------------|--------|
|                                                              | <i>n</i> | %      | <i>n</i>        | %      | <i>n</i>                  | %      |
| <b>Eligible Patients</b>                                     | 970      | 100.0% | 487             | 100.0% | 483                       | 100.0% |
| <b>Completed treatment</b>                                   | 875      | 90.2%  | 450             | 92.4%  | 425                       | 88.0%  |
| <b>Discontinued all treatment early</b>                      | 95       | 9.8%   | 37              | 7.6%   | 58                        | 12.0%  |
| Adverse event                                                | 40       | 4.1%   | 20              | 4.1%   | 20                        | 4.1%   |
| Refusal unrelated to AE                                      | 22       | 2.3%   | 9               | 1.8%   | 13                        | 2.7%   |
| Progression/relapse                                          | 9        | 0.9%   | 0               | 0      | 9                         | 1.9%   |
| Death                                                        | 11       | 1.1%   | 3               | 0.6%   | 8                         | 1.7%   |
| Other – not protocol specified                               | 13       | 1.3%   | 5               | 1.0%   | 8                         | 1.7%   |
| <b>Any discontinuation of Bv or Nivolumab*</b>               | 153      | 15.8%  | 46              | 9.4%   | 107                       | 22.2%  |
| <b>Discontinued Bv or Nivo, but continued other agents**</b> | 78       | 8.0%   | 19              | 3.9%   | 59                        | 12.2%  |
| <b>Received any G-CSF</b>                                    | 741      | 76.4%  | 274             | 56.3%  | 467                       | 96.7%  |
| <b>Dexrazoxane Use</b>                                       | 273      | 28.1%  | 142             | 29.2%  | 131                       | 27.1%  |
| <b>Major protocol deviation</b>                              | 11       | 1.1%   | 5               | 1.0%   | 6                         | 1.2%   |
| <b>Lost to follow-up</b>                                     | 4        | 0.4%   | 3               | 0.6%   | 1                         | 0.2%   |
| <b>Consent withdrawal after treatment initiation</b>         | 35       | 3.6%   | 15              | 3.1%   | 20                        | 4.1%   |

\*Excluded 5 patients who did not start protocol treatment in N-AVD arm, 6 patients who did not start protocol treatment in BV-AVD arm

\*\*Included patients who did not complete the protocol treatment and discontinued all other agents after Bv or Nivo discontinued

**Table S2: Per Protocol End-of-Treatment Radiation in Modified Intent-to-treat Analysis Set**

|                                                            | <b>N-AVD<br/>(n=487)</b> |             | <b>BV-AVD<br/>(n=483)</b> |             | <b>Total<br/>(n=970)</b> |             |
|------------------------------------------------------------|--------------------------|-------------|---------------------------|-------------|--------------------------|-------------|
|                                                            | <b>N</b>                 | <b>%</b>    | <b>N</b>                  | <b>%</b>    | <b>N</b>                 | <b>%</b>    |
| <b>Planned use of protocol-<br/>specified radiotherapy</b> | <b>286</b>               | <b>59%</b>  | <b>287</b>                | <b>59%</b>  | <b>573</b>               | <b>59%</b>  |
| <b>Received protocol-<br/>specified radiotherapy</b>       | <b>3</b>                 | <b>0.6%</b> | <b>4</b>                  | <b>0.8%</b> | <b>7</b>                 | <b>0.7%</b> |

**Table S3: End-of-treatment Metabolic Response by Arm in Modified Intent-to-treat Analysis Set**

|                                                               | <i>Total</i> |          | <i>Nivolumab + AVD</i> |          | <i>Brentuximab Vedotin + AVD</i> |          |
|---------------------------------------------------------------|--------------|----------|------------------------|----------|----------------------------------|----------|
|                                                               | <i>n</i>     | <i>%</i> | <i>n</i>               | <i>%</i> | <i>n</i>                         | <i>%</i> |
| <i>Eligible Patients who had PET-CT scan performed at EOT</i> | 894          | 100.0%   | 456                    | 100.0%   | 438                              | 100.0%   |
| <b><i>Deauville Score</i></b>                                 |              |          |                        |          |                                  |          |
| 1                                                             | 217          | 24.3%    | 125                    | 27.4%    | 92                               | 21.0%    |
| 2                                                             | 295          | 33.0%    | 166                    | 36.4%    | 129                              | 29.5%    |
| 3                                                             | 167          | 18.7%    | 88                     | 19.3%    | 79                               | 18.0%    |
| 4                                                             | 85           | 9.5%     | 39                     | 8.6%     | 46                               | 10.5%    |
| 5                                                             | 73           | 8.2%     | 16                     | 3.5%     | 57                               | 13.0%    |
| X                                                             | 49           | 5.5%     | 18                     | 3.9%     | 31                               | 7.1%     |
| <i>Not Reported</i>                                           | 8            | 0.9%     | 4                      | 0.9%     | 4                                | 0.9%     |
| <b><i>Deauville Score Group</i></b>                           |              |          |                        |          |                                  |          |
| 1-3                                                           | 679          | 76.0%    | 379                    | 83.1%    | 300                              | 68.5%    |
| 4-5                                                           | 158          | 17.7%    | 55                     | 12.1%    | 103                              | 23.5%    |
| X                                                             | 49           | 5.5%     | 18                     | 3.9%     | 31                               | 7.1%     |
| <i>Not Reported</i>                                           | 8            | 0.9%     | 4                      | 0.9%     | 4                                | 0.9%     |



**Table S4: Types of Event-Free Survival Event by Arm in Modified Intent-to-treat Analysis Set**

| Type of EFS Event                              | N-AVD<br>N=487 | BV-AVD<br>N=483 |
|------------------------------------------------|----------------|-----------------|
| Non-protocol chemotherapy prior to progression | 10 (2.1%)      | 7 (1.4%)        |
| Non-protocol radiation prior to progression    | 3 (0.6%)       | 5 (1.0%)        |
| Progression/Relapse                            | 32 (6.6%)      | 67 (13.9%)      |
| Death without progression                      | 7 (1.4%)       | 12 (2.5%)       |
| Total EFS events                               | 52 (10.7%)     | 91 (18.8%)      |

EFS = event-free survival; N-AVD = nivolumab, doxorubicin, vinblastine, dacarbazine; BV-AVD = brentuximab vedotin, doxorubicin, vinblastine, dacarbazine

**Table S5: Causes of Death by Arm in Modified Intent-to-treat Analysis Set**

| Cause of Death                   | N-AVD<br>N=487 | BV-AVD<br>N=483 |
|----------------------------------|----------------|-----------------|
| Infection/Sepsis                 | 4              | 6               |
| Lymphoma                         | 1              | 2               |
| Medical issues other than cancer | 2              | 4               |
| New primary malignancy           | 0              | 1               |
| Unknown                          | 0              | 1               |
| Total                            | 7              | 14              |

N-AVD = nivolumab, doxorubicin, vinblastine, dacarbazine; BV-AVD = brentuximab vedotin, doxorubicin, vinblastine, dacarbazine

**Table S6: Number of Deaths by Arm and Age Strata in Modified Intent-to-treat Analysis Set**

|                          | AGE: 12 - 17    |        |                           |        | AGE: 18 - 60    |        |                           |        | AGE: > 60       |        |                           |        |
|--------------------------|-----------------|--------|---------------------------|--------|-----------------|--------|---------------------------|--------|-----------------|--------|---------------------------|--------|
|                          | Nivolumab + AVD |        | Brentuximab Vedotin + AVD |        | Nivolumab + AVD |        | Brentuximab Vedotin + AVD |        | Nivolumab + AVD |        | Brentuximab Vedotin + AVD |        |
|                          | <i>n</i>        | %      | <i>n</i>                  | %      | <i>n</i>        | %      | <i>n</i>                  | %      | <i>n</i>        | %      | <i>n</i>                  | %      |
| <i>Eligible Patients</i> | 118             | 100.0% | 118                       | 100.0% | 321             | 100.0% | 318                       | 100.0% | 48              | 100.0% | 47                        | 100.0% |
| <i>Vital Status</i>      |                 |        |                           |        |                 |        |                           |        |                 |        |                           |        |
| <i>Death</i>             | 0               | 0      | 1                         | 0.8%   | 4               | 1.2%   | 4                         | 1.3%   | 3               | 6.3%   | 9                         | 19.1%  |
| <i>Alive</i>             | 118             | 100.0% | 117                       | 99.2%  | 317             | 98.8%  | 314                       | 98.7%  | 45              | 93.8%  | 38                        | 80.9%  |

**Table S7: Complete Listing of All Adverse Events at least Possibly Related to Study Treatment by Arm in Modified Intent-to-treat Analysis Set. Adverse events with no entries for grades 2 to 5 are not included.**

| ADVERSE EVENTS                 | Nivolumab + AVD<br>(n=482) |    |    |   |   | Brentuximab Vedotin + AVD<br>(n=476) |    |    |   |   |
|--------------------------------|----------------------------|----|----|---|---|--------------------------------------|----|----|---|---|
|                                | Grade                      |    |    |   |   | Grade                                |    |    |   |   |
|                                | 1                          | 2  | 3  | 4 | 5 | 1                                    | 2  | 3  | 4 | 5 |
| Abdominal pain                 | 36                         | 18 | 4  | 0 | 0 | 64                                   | 33 | 10 | 0 | 0 |
| Acute kidney injury            | 0                          | 0  | 2  | 0 | 0 | 0                                    | 0  | 2  | 1 | 0 |
| Adrenal insufficiency          | 0                          | 1  | 1  | 0 | 0 | 0                                    | 0  | 0  | 0 | 0 |
| Agitation                      | 3                          | 1  | 0  | 0 | 0 | 0                                    | 0  | 0  | 0 | 0 |
| Alkaline phosphatase increased | 50                         | 3  | 1  | 0 | 0 | 79                                   | 2  | 0  | 0 | 0 |
| Allergic reaction              | 0                          | 2  | 2  | 0 | 0 | 1                                    | 5  | 0  | 0 | 0 |
| Alopecia                       | 63                         | 40 | 0  | 0 | 0 | 50                                   | 74 | 0  | 0 | 0 |
| ALT increased                  | 112                        | 26 | 18 | 4 | 0 | 144                                  | 34 | 23 | 0 | 0 |
| Amenorrhea                     | 0                          | 1  | 0  | 0 | 0 | 0                                    | 5  | 0  | 0 | 0 |
| Amnesia                        | 0                          | 2  | 0  | 0 | 0 | 0                                    | 0  | 0  | 0 | 0 |
| Anal fissure                   | 0                          | 0  | 0  | 0 | 0 | 0                                    | 1  | 0  | 0 | 0 |
| Anemia                         | 105                        | 56 | 29 | 0 | 0 | 104                                  | 70 | 41 | 2 | 0 |
| Anorectal infection            | 0                          | 0  | 1  | 0 | 0 | 0                                    | 0  | 0  | 0 | 0 |
| Anorexia                       | 34                         | 25 | 2  | 0 | 0 | 48                                   | 51 | 7  | 0 | 0 |
| Anxiety                        | 8                          | 11 | 0  | 0 | 0 | 15                                   | 14 | 0  | 0 | 0 |
| Appendicitis                   | 0                          | 0  | 1  | 0 | 0 | 0                                    | 0  | 0  | 0 | 0 |
| Arthralgia                     | 46                         | 16 | 2  | 0 | 0 | 43                                   | 9  | 6  | 0 | 0 |
| Arthritis                      | 1                          | 3  | 0  | 0 | 0 | 0                                    | 0  | 0  | 0 | 0 |
| AST increased                  | 102                        | 11 | 9  | 3 | 0 | 130                                  | 16 | 13 | 1 | 0 |
| Atelectasis                    | 1                          | 0  | 0  | 0 | 0 | 0                                    | 1  | 0  | 0 | 0 |
| Atrial fibrillation            | 0                          | 1  | 0  | 0 | 0 | 0                                    | 0  | 1  | 0 | 0 |
| Autoimmune disorder            | 0                          | 0  | 1  | 0 | 0 | 0                                    | 0  | 0  | 1 | 0 |
| Back pain                      | 16                         | 11 | 0  | 0 | 0 | 23                                   | 6  | 4  | 0 | 0 |
| Bacteremia                     | 0                          | 0  | 0  | 0 | 0 | 0                                    | 2  | 0  | 0 | 0 |
| Bladder infection              | 0                          | 1  | 0  | 0 | 0 | 0                                    | 1  | 0  | 0 | 0 |
| Bloating                       | 6                          | 1  | 0  | 0 | 0 | 11                                   | 7  | 0  | 0 | 0 |
| Blood bilirubin increased      | 7                          | 1  | 3  | 0 | 0 | 5                                    | 6  | 3  | 0 | 0 |
| Blood/lymph disorder-Other     | 2                          | 1  | 0  | 0 | 0 | 4                                    | 1  | 0  | 0 | 0 |
| Blurred vision                 | 10                         | 1  | 0  | 0 | 0 | 13                                   | 2  | 0  | 0 | 0 |
| Bone pain                      | 23                         | 14 | 3  | 0 | 0 | 56                                   | 31 | 9  | 0 | 0 |
| Brachial plexopathy            | 0                          | 0  | 0  | 0 | 0 | 0                                    | 1  | 0  | 0 | 0 |
| Bronchial infection            | 0                          | 2  | 0  | 0 | 0 | 0                                    | 0  | 0  | 0 | 0 |
| Bronchospasm                   | 0                          | 1  | 0  | 0 | 0 | 0                                    | 0  | 0  | 0 | 0 |
| Bruising                       | 2                          | 0  | 0  | 0 | 0 | 7                                    | 1  | 0  | 0 | 0 |
| Bullous dermatitis             | 0                          | 0  | 0  | 0 | 0 | 0                                    | 1  | 0  | 0 | 0 |

| ADVERSE EVENTS               | Nivolumab + AVD |    |   |   |   | Brentuximab Vedotin + AVD |       |   |   |   |   |   |
|------------------------------|-----------------|----|---|---|---|---------------------------|-------|---|---|---|---|---|
|                              | (n=482)         |    |   |   |   | (n=476)                   |       |   |   |   |   |   |
|                              | Grade           | 1  | 2 | 3 | 4 | 5                         | Grade | 1 | 2 | 3 | 4 | 5 |
| Buttock pain                 | 0               | 1  | 0 | 0 | 0 | 0                         | 0     | 0 | 0 | 0 | 0 | 0 |
| Cardiac arrest               | 0               | 0  | 0 | 0 | 0 | 0                         | 0     | 0 | 0 | 2 | 0 | 0 |
| Cardiac disorder-Other, spec | 2               | 2  | 1 | 0 | 0 | 0                         | 0     | 0 | 0 | 0 | 0 | 0 |
| Cardiac troponin T increased | 0               | 0  | 1 | 0 | 0 | 0                         | 0     | 0 | 0 | 0 | 0 | 0 |
| Catheter related infection   | 0               | 0  | 1 | 0 | 0 | 0                         | 0     | 1 | 2 | 0 | 0 | 0 |
| Chest pain - cardiac         | 2               | 2  | 0 | 0 | 0 | 0                         | 0     | 0 | 0 | 0 | 0 | 0 |
| Chest wall pain              | 1               | 0  | 1 | 0 | 0 | 0                         | 1     | 0 | 0 | 0 | 0 | 0 |
| Chills                       | 20              | 1  | 0 | 0 | 0 | 19                        | 1     | 0 | 0 | 0 | 0 | 0 |
| Chronic kidney disease       | 0               | 1  | 0 | 0 | 0 | 0                         | 0     | 0 | 0 | 0 | 0 | 0 |
| Colitis                      | 1               | 4  | 1 | 0 | 0 | 1                         | 1     | 4 | 0 | 0 | 0 | 0 |
| Colonic obstruction          | 0               | 0  | 0 | 0 | 0 | 0                         | 0     | 1 | 0 | 0 | 0 | 0 |
| Confusion                    | 2               | 0  | 2 | 0 | 0 | 2                         | 0     | 0 | 0 | 0 | 0 | 0 |
| Conjunctivitis               | 0               | 1  | 0 | 0 | 0 | 3                         | 1     | 1 | 0 | 0 | 0 | 0 |
| Conjunctivitis infective     | 0               | 0  | 0 | 0 | 0 | 0                         | 1     | 1 | 0 | 0 | 0 | 0 |
| Constipation                 | 164             | 28 | 1 | 0 | 0 | 146                       | 50    | 8 | 0 | 0 | 0 | 0 |
| Cough                        | 26              | 7  | 0 | 0 | 0 | 23                        | 8     | 0 | 0 | 0 | 0 | 0 |
| CPK increased                | 1               | 0  | 0 | 0 | 0 | 0                         | 1     | 0 | 0 | 0 | 0 | 0 |
| Creatinine increased         | 25              | 2  | 0 | 0 | 0 | 10                        | 3     | 0 | 0 | 0 | 0 | 0 |
| Cyanosis                     | 0               | 1  | 0 | 0 | 0 | 0                         | 0     | 0 | 0 | 0 | 0 | 0 |
| Dehydration                  | 4               | 6  | 4 | 0 | 0 | 4                         | 18    | 9 | 0 | 1 | 0 | 0 |
| Delirium                     | 0               | 0  | 0 | 0 | 0 | 0                         | 0     | 1 | 0 | 0 | 0 | 0 |
| Depression                   | 6               | 3  | 0 | 0 | 0 | 7                         | 2     | 0 | 0 | 0 | 0 | 0 |
| Diarrhea                     | 68              | 24 | 8 | 0 | 0 | 93                        | 27    | 9 | 0 | 0 | 0 | 0 |
| DIC                          | 0               | 1  | 0 | 0 | 0 | 0                         | 0     | 0 | 0 | 0 | 0 | 0 |
| Dizziness                    | 28              | 1  | 0 | 0 | 0 | 36                        | 4     | 0 | 0 | 0 | 0 | 0 |
| DLOC                         | 1               | 0  | 0 | 0 | 0 | 1                         | 0     | 0 | 1 | 0 | 0 | 0 |
| Dry mouth                    | 17              | 2  | 0 | 0 | 0 | 29                        | 3     | 0 | 0 | 0 | 0 | 0 |
| Dry skin                     | 14              | 1  | 0 | 0 | 0 | 15                        | 0     | 0 | 0 | 0 | 0 | 0 |
| Dysgeusia                    | 24              | 11 | 0 | 0 | 0 | 44                        | 15    | 0 | 0 | 0 | 0 | 0 |
| Dyspepsia                    | 13              | 20 | 0 | 0 | 0 | 11                        | 10    | 0 | 0 | 0 | 0 | 0 |
| Dysphagia                    | 3               | 4  | 1 | 0 | 0 | 3                         | 4     | 0 | 0 | 0 | 0 | 0 |
| Dyspnea                      | 31              | 7  | 3 | 1 | 0 | 39                        | 14    | 3 | 2 | 0 | 0 | 0 |
| ECG QT corrected int prolong | 0               | 0  | 1 | 0 | 0 | 0                         | 0     | 0 | 0 | 0 | 0 | 0 |
| Eczema                       | 2               | 0  | 0 | 0 | 0 | 2                         | 3     | 1 | 0 | 0 | 0 | 0 |
| Edema face                   | 0               | 1  | 0 | 0 | 0 | 4                         | 1     | 0 | 0 | 0 | 0 | 0 |
| Edema limbs                  | 14              | 1  | 1 | 0 | 0 | 15                        | 1     | 0 | 0 | 0 | 0 | 0 |
| Ejection fraction decreased  | 0               | 2  | 1 | 0 | 0 | 0                         | 2     | 1 | 0 | 0 | 0 | 0 |
| Endocrine disorders-Other    | 6               | 3  | 0 | 0 | 0 | 0                         | 0     | 0 | 0 | 0 | 0 | 0 |
| Enterocolitis                | 0               | 1  | 1 | 0 | 0 | 0                         | 1     | 0 | 0 | 0 | 0 | 0 |
| Enterocolitis infectious     | 0               | 0  | 1 | 0 | 0 | 0                         | 2     | 2 | 0 | 0 | 0 | 0 |

| ADVERSE EVENTS                | Nivolumab + AVD<br>(n=482) |    |    |   |   | Brentuximab Vedotin + AVD<br>(n=476) |    |    |   |   |
|-------------------------------|----------------------------|----|----|---|---|--------------------------------------|----|----|---|---|
|                               | Grade                      |    |    |   |   | Grade                                |    |    |   |   |
|                               | 1                          | 2  | 3  | 4 | 5 | 1                                    | 2  | 3  | 4 | 5 |
| Erectile dysfunction          | 1                          | 1  | 0  | 0 | 0 | 0                                    | 0  | 0  | 0 | 0 |
| Erythroderma                  | 0                          | 0  | 1  | 0 | 0 | 0                                    | 0  | 0  | 0 | 0 |
| Esophageal pain               | 0                          | 0  | 1  | 0 | 0 | 0                                    | 0  | 0  | 0 | 0 |
| Esophagitis                   | 1                          | 0  | 1  | 0 | 0 | 1                                    | 2  | 0  | 0 | 0 |
| Extrapyramidal disorder       | 0                          | 1  | 0  | 0 | 0 | 1                                    | 1  | 0  | 0 | 0 |
| Facial muscle weakness        | 0                          | 1  | 0  | 0 | 0 | 0                                    | 0  | 0  | 0 | 0 |
| Fall                          | 4                          | 0  | 1  | 0 | 0 | 8                                    | 1  | 0  | 0 | 0 |
| Fatigue                       | 156                        | 67 | 5  | 0 | 0 | 151                                  | 81 | 10 | 0 | 0 |
| Febrile neutropenia           | 0                          | 0  | 27 | 1 | 0 | 0                                    | 0  | 27 | 6 | 0 |
| Fever                         | 39                         | 18 | 5  | 0 | 0 | 42                                   | 17 | 2  | 0 | 0 |
| Fibrinogen decreased          | 0                          | 2  | 0  | 0 | 0 | 0                                    | 0  | 0  | 0 | 0 |
| Flatulence                    | 4                          | 0  | 0  | 0 | 0 | 4                                    | 2  | 0  | 0 | 0 |
| Flu like symptoms             | 3                          | 1  | 0  | 0 | 0 | 3                                    | 0  | 0  | 0 | 0 |
| Flushing                      | 8                          | 2  | 0  | 0 | 0 | 2                                    | 0  | 1  | 0 | 0 |
| Folliculitis                  | 2                          | 0  | 0  | 0 | 0 | 0                                    | 1  | 0  | 0 | 0 |
| Fracture                      | 0                          | 0  | 0  | 0 | 0 | 0                                    | 1  | 0  | 0 | 0 |
| Gait disturbance              | 0                          | 0  | 0  | 0 | 0 | 1                                    | 1  | 0  | 0 | 0 |
| Gastric hemorrhage            | 0                          | 0  | 0  | 0 | 0 | 0                                    | 0  | 1  | 0 | 0 |
| Gastritis                     | 2                          | 4  | 3  | 0 | 0 | 3                                    | 5  | 0  | 0 | 0 |
| Gastroparesis                 | 0                          | 0  | 0  | 0 | 0 | 0                                    | 1  | 0  | 0 | 0 |
| Gen disorders/admin site cond | 6                          | 0  | 0  | 0 | 0 | 1                                    | 4  | 0  | 0 | 0 |
| Generalized edema             | 0                          | 1  | 0  | 0 | 0 | 0                                    | 0  | 0  | 0 | 0 |
| Generalized muscle weakness   | 11                         | 5  | 0  | 0 | 0 | 16                                   | 7  | 2  | 0 | 0 |
| GERD                          | 12                         | 14 | 0  | 0 | 0 | 14                                   | 25 | 0  | 0 | 0 |
| GGT increased                 | 2                          | 0  | 2  | 0 | 0 | 3                                    | 1  | 0  | 0 | 0 |
| GI disorders-Other, specify   | 8                          | 3  | 0  | 0 | 0 | 8                                    | 4  | 0  | 2 | 0 |
| Guillain-Barre syndrome       | 0                          | 0  | 0  | 0 | 0 | 0                                    | 0  | 0  | 1 | 0 |
| Hand-Foot syndrome            | 1                          | 0  | 0  | 0 | 0 | 1                                    | 1  | 0  | 0 | 0 |
| Headache                      | 44                         | 24 | 1  | 0 | 0 | 67                                   | 6  | 2  | 0 | 0 |
| Heart failure                 | 0                          | 0  | 2  | 0 | 0 | 0                                    | 0  | 1  | 0 | 0 |
| Hematuria                     | 3                          | 0  | 1  | 0 | 0 | 0                                    | 0  | 0  | 0 | 0 |
| Hemolysis                     | 0                          | 0  | 1  | 0 | 0 | 0                                    | 0  | 0  | 0 | 0 |
| Hemorrhoids                   | 4                          | 0  | 0  | 0 | 0 | 0                                    | 1  | 0  | 0 | 0 |
| Hepatic failure               | 0                          | 0  | 2  | 0 | 0 | 0                                    | 0  | 0  | 0 | 0 |
| Hepatobil disorders-Other     | 0                          | 1  | 1  | 0 | 0 | 0                                    | 0  | 1  | 0 | 0 |
| Herpes simplex reactivation   | 0                          | 1  | 0  | 0 | 0 | 2                                    | 1  | 0  | 0 | 0 |
| Hiccups                       | 3                          | 2  | 1  | 0 | 0 | 11                                   | 0  | 0  | 0 | 0 |
| Hoarseness                    | 0                          | 0  | 0  | 0 | 0 | 3                                    | 1  | 0  | 0 | 0 |
| Hot flashes                   | 6                          | 3  | 0  | 0 | 0 | 19                                   | 0  | 0  | 0 | 0 |
| Hypercalcemia                 | 3                          | 2  | 0  | 1 | 0 | 8                                    | 1  | 1  | 0 | 0 |

| ADVERSE EVENTS                | Nivolumab + AVD |    |    |   |   | Brentuximab Vedotin + AVD |       |    |    |   |   |   |
|-------------------------------|-----------------|----|----|---|---|---------------------------|-------|----|----|---|---|---|
|                               | (n=482)         |    |    |   |   | (n=476)                   |       |    |    |   |   |   |
|                               | Grade           | 1  | 2  | 3 | 4 | 5                         | Grade | 1  | 2  | 3 | 4 | 5 |
| Hyperglycemia                 | 51              | 3  | 3  | 0 | 0 | 57                        | 3     | 3  | 0  | 0 | 0 | 0 |
| Hyperhidrosis                 | 8               | 6  | 0  | 0 | 0 | 10                        | 5     | 0  | 0  | 0 | 0 | 0 |
| Hyperkalemia                  | 3               | 1  | 1  | 0 | 0 | 4                         | 0     | 0  | 0  | 0 | 0 | 0 |
| Hypermagnesemia               | 3               | 0  | 1  | 0 | 0 | 3                         | 0     | 0  | 0  | 0 | 0 | 0 |
| Hypertension                  | 15              | 23 | 3  | 0 | 0 | 13                        | 22    | 8  | 0  | 0 | 0 | 0 |
| Hyperthyroidism               | 11              | 2  | 0  | 0 | 0 | 0                         | 0     | 0  | 0  | 0 | 0 | 0 |
| Hypertriglyceridemia          | 2               | 0  | 0  | 0 | 0 | 0                         | 2     | 0  | 0  | 0 | 0 | 0 |
| Hyperuricemia                 | 4               | 0  | 1  | 0 | 0 | 6                         | 0     | 0  | 0  | 0 | 0 | 0 |
| Hypoalbuminemia               | 22              | 18 | 2  | 0 | 0 | 27                        | 10    | 2  | 0  | 0 | 0 | 0 |
| Hypocalcemia                  | 23              | 10 | 0  | 0 | 0 | 23                        | 10    | 1  | 0  | 0 | 0 | 0 |
| Hypoglycemia                  | 5               | 2  | 0  | 0 | 0 | 4                         | 1     | 1  | 0  | 0 | 0 | 0 |
| Hypokalemia                   | 25              | 1  | 3  | 0 | 0 | 41                        | 7     | 14 | 0  | 0 | 0 | 0 |
| Hypomagnesemia                | 3               | 1  | 0  | 0 | 0 | 17                        | 4     | 0  | 0  | 0 | 0 | 0 |
| Hyponatremia                  | 23              | 5  | 1  | 0 | 0 | 43                        | 9     | 2  | 0  | 0 | 0 | 0 |
| Hypophosphatemia              | 10              | 1  | 0  | 0 | 0 | 13                        | 5     | 1  | 0  | 0 | 0 | 0 |
| Hypotension                   | 7               | 6  | 4  | 0 | 0 | 7                         | 6     | 5  | 0  | 0 | 0 | 0 |
| Hypothyroidism                | 13              | 21 | 1  | 0 | 0 | 2                         | 1     | 0  | 0  | 0 | 0 | 0 |
| Hypoxia                       | 0               | 2  | 1  | 0 | 0 | 0                         | 1     | 2  | 0  | 0 | 0 | 0 |
| Ileus                         | 0               | 0  | 0  | 0 | 0 | 0                         | 3     | 1  | 0  | 0 | 0 | 0 |
| Infections/infestations-Other | 6               | 6  | 5  | 1 | 0 | 5                         | 3     | 4  | 0  | 0 | 0 | 0 |
| Infusion related reaction     | 6               | 25 | 5  | 0 | 0 | 3                         | 7     | 0  | 0  | 0 | 0 | 0 |
| Infusion site extravasation   | 0               | 2  | 0  | 0 | 0 | 0                         | 2     | 0  | 0  | 0 | 0 | 0 |
| INR increased                 | 1               | 0  | 2  | 0 | 0 | 1                         | 0     | 0  | 0  | 0 | 0 | 0 |
| Insomnia                      | 20              | 8  | 1  | 0 | 0 | 26                        | 26    | 2  | 0  | 0 | 0 | 0 |
| Investigations-Other, specify | 11              | 1  | 1  | 0 | 0 | 8                         | 2     | 0  | 0  | 0 | 0 | 0 |
| Irregular menstruation        | 3               | 1  | 0  | 0 | 0 | 5                         | 0     | 0  | 0  | 0 | 0 | 0 |
| Laryngopharyngeal dysesthesia | 0               | 1  | 0  | 0 | 0 | 0                         | 0     | 0  | 0  | 0 | 0 | 0 |
| Lethargy                      | 3               | 0  | 0  | 0 | 0 | 1                         | 1     | 0  | 0  | 0 | 0 | 0 |
| Leukocytosis                  | 0               | 0  | 2  | 0 | 0 | 0                         | 0     | 6  | 0  | 0 | 0 | 0 |
| Libido decreased              | 3               | 3  | 0  | 0 | 0 | 3                         | 0     | 0  | 0  | 0 | 0 | 0 |
| Lip infection                 | 1               | 2  | 0  | 0 | 0 | 0                         | 0     | 0  | 0  | 0 | 0 | 0 |
| Lipase increased              | 1               | 0  | 1  | 0 | 0 | 0                         | 1     | 0  | 0  | 0 | 0 | 0 |
| Lung infection                | 0               | 4  | 5  | 1 | 0 | 0                         | 6     | 8  | 0  | 0 | 0 | 0 |
| Lymph gland infection         | 0               | 0  | 1  | 0 | 0 | 0                         | 0     | 0  | 0  | 0 | 0 | 0 |
| Lymph node pain               | 1               | 0  | 0  | 0 | 0 | 2                         | 1     | 0  | 0  | 0 | 0 | 0 |
| Lymphocyte count decreased    | 39              | 34 | 26 | 4 | 0 | 28                        | 40    | 27 | 14 | 0 | 0 | 0 |
| Lymphocyte count increased    | 0               | 3  | 1  | 0 | 0 | 0                         | 10    | 0  | 0  | 0 | 0 | 0 |
| Malaise                       | 6               | 2  | 0  | 0 | 0 | 2                         | 1     | 0  | 0  | 0 | 0 | 0 |
| Memory impairment             | 7               | 1  | 0  | 0 | 0 | 4                         | 0     | 0  | 0  | 0 | 0 | 0 |
| Meningitis                    | 0               | 0  | 1  | 0 | 0 | 0                         | 0     | 0  | 0  | 0 | 0 | 0 |

| ADVERSE EVENTS                | Nivolumab + AVD |     |    |     |   | Brentuximab Vedotin + AVD |       |    |    |   |   |
|-------------------------------|-----------------|-----|----|-----|---|---------------------------|-------|----|----|---|---|
|                               | (n=482)         |     |    |     |   | (n=476)                   |       |    |    |   |   |
|                               | Grade           | 1   | 2  | 3   | 4 | 5                         | Grade | 1  | 2  | 3 | 4 |
| Metab/nutrition disorders-Oth | 5               | 0   | 0  | 0   | 0 | 0                         | 1     | 1  | 0  | 0 | 0 |
| Movements involuntary         | 0               | 1   | 0  | 0   | 0 | 2                         | 0     | 0  | 0  | 0 | 0 |
| MS/connective tissue disorder | 3               | 1   | 1  | 0   | 0 | 4                         | 1     | 0  | 0  | 0 | 0 |
| Mucosal infection             | 0               | 1   | 0  | 0   | 0 | 0                         | 1     | 0  | 0  | 0 | 0 |
| Mucositis oral                | 64              | 34  | 9  | 0   | 0 | 55                        | 34    | 11 | 0  | 0 | 0 |
| Muscle cramp                  | 13              | 1   | 0  | 0   | 0 | 15                        | 3     | 1  | 0  | 0 | 0 |
| Muscle weakness lower limb    | 2               | 3   | 0  | 0   | 0 | 3                         | 3     | 1  | 0  | 0 | 0 |
| Muscle weakness trunk         | 0               | 0   | 1  | 0   | 0 | 0                         | 0     | 0  | 0  | 0 | 0 |
| Muscle weakness upper limb    | 0               | 1   | 0  | 0   | 0 | 1                         | 1     | 0  | 0  | 0 | 0 |
| Myalgia                       | 40              | 11  | 1  | 0   | 0 | 41                        | 15    | 1  | 0  | 0 | 0 |
| Myositis                      | 1               | 0   | 1  | 0   | 0 | 0                         | 0     | 0  | 0  | 0 | 0 |
| Nail infection                | 1               | 2   | 0  | 0   | 0 | 2                         | 0     | 0  | 0  | 0 | 0 |
| Nasal congestion              | 6               | 0   | 0  | 0   | 0 | 10                        | 3     | 0  | 0  | 0 | 0 |
| Nausea                        | 196             | 109 | 7  | 0   | 0 | 198                       | 117   | 16 | 0  | 0 | 0 |
| Neck edema                    | 3               | 0   | 0  | 0   | 0 | 0                         | 2     | 0  | 0  | 0 | 0 |
| Neck pain                     | 4               | 0   | 0  | 0   | 0 | 2                         | 1     | 0  | 0  | 0 | 0 |
| Nervous sys disorders-Other   | 2               | 2   | 0  | 0   | 0 | 5                         | 2     | 0  | 0  | 0 | 0 |
| Neutrophil count decreased    | 14              | 26  | 99 | 133 | 0 | 15                        | 19    | 49 | 77 | 0 | 0 |
| Non-cardiac chest pain        | 10              | 6   | 0  | 0   | 0 | 13                        | 3     | 0  | 0  | 0 | 0 |
| Oral dysesthesia              | 4               | 1   | 0  | 0   | 0 | 6                         | 0     | 0  | 0  | 0 | 0 |
| Oral pain                     | 26              | 3   | 1  | 0   | 0 | 23                        | 1     | 0  | 0  | 0 | 0 |
| Pain                          | 27              | 12  | 4  | 0   | 0 | 21                        | 10    | 1  | 0  | 0 | 0 |
| Pain in extremity             | 17              | 4   | 1  | 0   | 0 | 26                        | 8     | 2  | 0  | 0 | 0 |
| Palpitations                  | 5               | 2   | 0  | 0   | 0 | 2                         | 0     | 0  | 0  | 0 | 0 |
| Pancreatitis                  | 0               | 1   | 3  | 0   | 0 | 0                         | 0     | 1  | 0  | 0 | 0 |
| Papulopustular rash           | 4               | 0   | 0  | 0   | 0 | 2                         | 1     | 0  | 0  | 0 | 0 |
| Paresthesia                   | 32              | 3   | 1  | 0   | 0 | 36                        | 6     | 1  | 0  | 0 | 0 |
| Paronychia                    | 0               | 1   | 0  | 0   | 0 | 1                         | 1     | 0  | 0  | 0 | 0 |
| Paroxysmal atrial tachycardia | 1               | 1   | 0  | 0   | 0 | 0                         | 0     | 0  | 0  | 0 | 0 |
| Pelvic pain                   | 1               | 0   | 0  | 0   | 0 | 0                         | 1     | 1  | 0  | 0 | 0 |
| Pericardial effusion          | 0               | 1   | 0  | 0   | 0 | 0                         | 0     | 0  | 0  | 0 | 0 |
| Pericarditis                  | 0               | 3   | 0  | 0   | 0 | 0                         | 0     | 0  | 0  | 0 | 0 |
| Peripheral motor neuropathy   | 13              | 7   | 1  | 0   | 0 | 12                        | 17    | 6  | 0  | 0 | 0 |
| Peripheral sensory neuropathy | 98              | 36  | 5  | 0   | 0 | 115                       | 112   | 39 | 0  | 0 | 0 |
| Pharyngitis                   | 0               | 0   | 0  | 0   | 0 | 0                         | 1     | 0  | 0  | 0 | 0 |
| Phlebitis                     | 0               | 3   | 0  | 0   | 0 | 0                         | 4     | 0  | 0  | 0 | 0 |
| Photophobia                   | 1               | 0   | 0  | 0   | 0 | 1                         | 1     | 0  | 0  | 0 | 0 |
| Photosensitivity              | 1               | 0   | 0  | 0   | 0 | 1                         | 1     | 0  | 0  | 0 | 0 |
| Platelet count decreased      | 36              | 7   | 4  | 5   | 0 | 63                        | 7     | 8  | 8  | 0 | 0 |
| Pleural effusion              | 0               | 1   | 1  | 0   | 0 | 0                         | 0     | 0  | 1  | 0 | 0 |



| ADVERSE EVENTS                | Nivolumab + AVD |   |   |   |   | Brentuximab Vedotin + AVD |    |   |   |   |
|-------------------------------|-----------------|---|---|---|---|---------------------------|----|---|---|---|
|                               | (n=482)         |   |   |   |   | (n=476)                   |    |   |   |   |
|                               | Grade           |   |   |   |   | Grade                     |    |   |   |   |
|                               | 1               | 2 | 3 | 4 | 5 | 1                         | 2  | 3 | 4 | 5 |
| Pneumonitis                   | 1               | 7 | 3 | 0 | 0 | 1                         | 4  | 7 | 2 | 1 |
| Presyncope                    | 0               | 2 | 0 | 0 | 0 | 0                         | 3  | 0 | 0 | 0 |
| Productive cough              | 2               | 0 | 0 | 0 | 0 | 1                         | 1  | 0 | 0 | 0 |
| Proteinuria                   | 0               | 1 | 0 | 0 | 0 | 2                         | 0  | 0 | 0 | 0 |
| Pruritus                      | 39              | 7 | 0 | 0 | 0 | 20                        | 5  | 0 | 0 | 0 |
| Psych disorders-Other, spec   | 1               | 0 | 0 | 0 | 0 | 2                         | 1  | 0 | 0 | 0 |
| Pulmonary edema               | 0               | 0 | 1 | 0 | 0 | 0                         | 0  | 0 | 1 | 0 |
| Rash acneiform                | 16              | 1 | 0 | 0 | 0 | 11                        | 1  | 0 | 0 | 0 |
| Rash maculo-papular           | 43              | 7 | 4 | 0 | 0 | 44                        | 14 | 0 | 0 | 0 |
| Rash pustular                 | 0               | 0 | 0 | 0 | 0 | 0                         | 1  | 0 | 0 | 0 |
| Rectal fissure                | 0               | 0 | 0 | 0 | 0 | 0                         | 1  | 0 | 0 | 0 |
| Rectal pain                   | 1               | 0 | 0 | 0 | 0 | 2                         | 1  | 1 | 0 | 0 |
| Renal/urinary disorders-Other | 0               | 1 | 0 | 0 | 0 | 1                         | 0  | 0 | 0 | 0 |
| Resp/thoracic/mediastinal ds  | 2               | 1 | 0 | 0 | 0 | 3                         | 2  | 0 | 0 | 0 |
| Respiratory failure           | 0               | 0 | 0 | 0 | 0 | 0                         | 0  | 0 | 3 | 0 |
| Restrictive cardiomyopathy    | 0               | 1 | 0 | 0 | 0 | 0                         | 0  | 0 | 0 | 0 |
| Rhabdomyolysis                | 0               | 1 | 0 | 0 | 0 | 0                         | 0  | 0 | 0 | 0 |
| Salivary duct inflammation    | 0               | 1 | 0 | 0 | 0 | 0                         | 2  | 0 | 0 | 0 |
| Seizure                       | 1               | 0 | 1 | 0 | 0 | 0                         | 1  | 0 | 0 | 0 |
| Sepsis                        | 0               | 0 | 3 | 2 | 3 | 0                         | 0  | 8 | 4 | 4 |
| Sinus bradycardia             | 1               | 0 | 0 | 0 | 0 | 2                         | 0  | 0 | 1 | 0 |
| Sinus tachycardia             | 8               | 9 | 0 | 0 | 0 | 18                        | 3  | 3 | 0 | 0 |
| Skin hyperpigmentation        | 8               | 0 | 0 | 0 | 0 | 6                         | 2  | 0 | 0 | 0 |
| Skin hypopigmentation         | 2               | 1 | 0 | 0 | 0 | 0                         | 0  | 0 | 0 | 0 |
| Skin infection                | 2               | 4 | 0 | 0 | 0 | 1                         | 6  | 3 | 0 | 0 |
| Skin/subq tissue ds-Other     | 12              | 4 | 0 | 0 | 0 | 13                        | 5  | 0 | 0 | 0 |
| Small intestinal obstruction  | 0               | 0 | 0 | 0 | 0 | 0                         | 0  | 1 | 0 | 0 |
| Somnolence                    | 0               | 0 | 0 | 0 | 0 | 0                         | 1  | 0 | 0 | 0 |
| Sore throat                   | 12              | 3 | 1 | 0 | 0 | 26                        | 1  | 0 | 0 | 0 |
| Spasticity                    | 0               | 1 | 0 | 0 | 0 | 1                         | 0  | 0 | 0 | 0 |
| Stomach pain                  | 8               | 2 | 0 | 0 | 0 | 7                         | 3  | 0 | 0 | 0 |
| Stroke                        | 0               | 0 | 1 | 0 | 0 | 0                         | 0  | 0 | 0 | 0 |
| Superficial thrombophlebitis  | 0               | 3 | 0 | 0 | 0 | 0                         | 3  | 0 | 0 | 0 |
| Supraventricular tachycardia  | 0               | 0 | 0 | 0 | 0 | 0                         | 1  | 0 | 0 | 0 |
| Syncope                       | 0               | 0 | 1 | 0 | 0 | 0                         | 0  | 2 | 0 | 0 |
| Tendon reflex decreased       | 0               | 1 | 0 | 0 | 0 | 1                         | 0  | 0 | 0 | 0 |
| Thromboembolic event          | 1               | 6 | 4 | 1 | 0 | 0                         | 4  | 5 | 0 | 0 |
| Thrush                        | 2               | 5 | 0 | 0 | 0 | 4                         | 10 | 0 | 0 | 0 |
| Tooth infection               | 0               | 1 | 0 | 0 | 0 | 0                         | 0  | 0 | 0 | 0 |
| Toothache                     | 3               | 0 | 0 | 0 | 0 | 1                         | 1  | 0 | 0 | 0 |

| ADVERSE EVENTS                               | Nivolumab + AVD<br>(n=482) |     |     |     |   | Brentuximab Vedotin + AVD<br>(n=476) |     |     |    |   |
|----------------------------------------------|----------------------------|-----|-----|-----|---|--------------------------------------|-----|-----|----|---|
|                                              | Grade                      |     |     |     |   | Grade                                |     |     |    |   |
|                                              | 1                          | 2   | 3   | 4   | 5 | 1                                    | 2   | 3   | 4  | 5 |
| Tracheal mucositis                           | 0                          | 0   | 0   | 0   | 0 | 0                                    | 0   | 1   | 0  | 0 |
| Tracheitis                                   | 0                          | 1   | 0   | 0   | 0 | 0                                    | 0   | 0   | 0  | 0 |
| Tremor                                       | 3                          | 1   | 0   | 0   | 0 | 3                                    | 0   | 0   | 0  | 0 |
| Tumor lysis syndrome                         | 0                          | 0   | 1   | 0   | 0 | 0                                    | 0   | 1   | 0  | 0 |
| Typhlitis                                    | 0                          | 0   | 0   | 0   | 0 | 0                                    | 0   | 3   | 0  | 0 |
| Upper GI hemorrhage                          | 0                          | 0   | 1   | 0   | 0 | 0                                    | 0   | 0   | 0  | 0 |
| Upper respiratory infection                  | 0                          | 5   | 1   | 0   | 0 | 0                                    | 7   | 1   | 0  | 0 |
| Urinary tract infection                      | 0                          | 5   | 2   | 0   | 0 | 0                                    | 10  | 2   | 0  | 0 |
| Urticaria                                    | 0                          | 1   | 0   | 0   | 0 | 2                                    | 0   | 0   | 0  | 0 |
| Vaginal infection                            | 0                          | 2   | 0   | 0   | 0 | 2                                    | 2   | 0   | 0  | 0 |
| Vasc disorders-Other, spec                   | 1                          | 0   | 2   | 0   | 0 | 0                                    | 1   | 0   | 0  | 0 |
| Vascular access complication                 | 0                          | 1   | 0   | 0   | 0 | 0                                    | 0   | 2   | 0  | 0 |
| Vasovagal reaction                           | 0                          | 0   | 0   | 0   | 0 | 0                                    | 0   | 1   | 0  | 0 |
| Ventricular arrhythmia                       | 0                          | 1   | 0   | 0   | 0 | 0                                    | 0   | 1   | 0  | 0 |
| Ventricular tachycardia                      | 0                          | 1   | 0   | 0   | 0 | 0                                    | 0   | 0   | 1  | 0 |
| Vertigo                                      | 1                          | 1   | 0   | 0   | 0 | 1                                    | 0   | 0   | 0  | 0 |
| Vision decreased                             | 0                          | 2   | 1   | 0   | 0 | 0                                    | 0   | 0   | 0  | 0 |
| Vomiting                                     | 76                         | 49  | 9   | 0   | 0 | 84                                   | 60  | 12  | 0  | 1 |
| Watering eyes                                | 1                          | 0   | 0   | 0   | 0 | 4                                    | 1   | 0   | 0  | 0 |
| Weight gain                                  | 3                          | 7   | 3   | 0   | 0 | 4                                    | 4   | 0   | 0  | 0 |
| Weight loss                                  | 17                         | 8   | 0   | 0   | 0 | 30                                   | 30  | 11  | 0  | 0 |
| White blood cell decreased                   | 48                         | 76  | 61  | 12  | 0 | 33                                   | 34  | 35  | 26 | 0 |
| Wound infection                              | 0                          | 0   | 0   | 0   | 0 | 0                                    | 1   | 0   | 0  | 0 |
| <b>MAX. GRADE ALL HEM<br/>TOXICITIES</b>     | 49                         | 50  | 114 | 137 | 0 | 66                                   | 57  | 71  | 86 | 0 |
| <b>MAX. GRADE ALL NON-HEM<br/>TOXICITIES</b> | 91                         | 228 | 119 | 10  | 3 | 54                                   | 204 | 168 | 17 | 6 |
| <b>MAX. GRADE ANY ADVERSE<br/>EVENT</b>      | 44                         | 112 | 159 | 142 | 3 | 47                                   | 153 | 153 | 94 | 6 |

**Table S8: Grade  $\geq$  3 Adverse Events by Arm ( $\geq$  3% of patients) by Arm in Modified Intent-to-treat Analysis Set**

| <b>Adverse Event Type</b>     | <b>N-AVD</b>                         | <b>BV-AVD</b>                        |
|-------------------------------|--------------------------------------|--------------------------------------|
|                               | <b>n = 482</b>                       | <b>n = 476</b>                       |
|                               | <b>Grade <math>\geq</math><br/>3</b> | <b>Grade <math>\geq</math><br/>3</b> |
|                               | <b>No (%)</b>                        | <b>No (%)</b>                        |
| Neutrophil count decreased    | 232 (48%)                            | 126 (26%)                            |
| White blood cell decreased    | 73 (15%)                             | 61 (13%)                             |
| Anemia                        | 29 (6%)                              | 43 (9%)                              |
| Lymphocyte count decreased    | 30 (6%)                              | 41 (9%)                              |
| Febrile neutropenia           | 28 (6%)                              | 33 (7%)                              |
| ALT increased                 | 22 (5%)                              | 23 (5%)                              |
| Peripheral sensory neuropathy | 5 (1%)                               | 39 (8%)                              |
| AST increased                 | 12 (2%)                              | 14 (3%)                              |
| Platelet count decreased      | 9 (2%)                               | 16 (3%)                              |
| Sepsis                        | 8 (2%)                               | 16 (3%)                              |

ALT = alanine aminotransferase; AST = aspartate aminotransferase; N-AVD = nivolumab, doxorubicin, vinblastine, dacarbazine; BV-AVD = brentuximab vedotin, doxorubicin, vinblastine, dacarbazine

**Table S9: Possible Immune-Related Adverse Events by Arm in Modified Intent-to-Treat Analysis Set. Note: List includes AEs (e.g. ALT increased) that were not confirmed to be immune-related but are included here for completeness.**

| ADVERSE EVENTS            | Nivolumab + AVD<br>(n=482) |    |    |   |   | Brentuximab Vedotin + AVD<br>(n=476) |    |    |   |   |
|---------------------------|----------------------------|----|----|---|---|--------------------------------------|----|----|---|---|
|                           | Grade                      |    |    |   |   | Grade                                |    |    |   |   |
|                           | 1                          | 2  | 3  | 4 | 5 | 1                                    | 2  | 3  | 4 | 5 |
| Adrenal insufficiency     | 0                          | 1  | 1  | 0 | 0 | 0                                    | 0  | 0  | 0 | 0 |
| ALT increased             | 112                        | 26 | 18 | 4 | 0 | 144                                  | 34 | 23 | 0 | 0 |
| Arthralgia                | 46                         | 16 | 2  | 0 | 0 | 43                                   | 9  | 6  | 0 | 0 |
| Arthritis                 | 1                          | 3  | 0  | 0 | 0 | 0                                    | 0  | 0  | 0 | 0 |
| AST increased             | 102                        | 11 | 9  | 3 | 0 | 130                                  | 16 | 13 | 1 | 0 |
| Blood bilirubin increased | 7                          | 1  | 3  | 0 | 0 | 5                                    | 6  | 3  | 0 | 0 |
| Diarrhea                  | 68                         | 24 | 8  | 0 | 0 | 93                                   | 27 | 9  | 0 | 0 |
| Enterocolitis             | 0                          | 1  | 1  | 0 | 0 | 0                                    | 1  | 0  | 0 | 0 |
| Esophagitis               | 1                          | 0  | 1  | 0 | 0 | 1                                    | 2  | 0  | 0 | 0 |
| Guillain-Barre syndrome   | 0                          | 0  | 0  | 0 | 0 | 0                                    | 0  | 0  | 1 | 0 |
| Hyperthyroidism           | 11                         | 2  | 0  | 0 | 0 | 0                                    | 0  | 0  | 0 | 0 |
| Hypothyroidism            | 13                         | 21 | 1  | 0 | 0 | 2                                    | 1  | 0  | 0 | 0 |
| Lipase increased          | 1                          | 0  | 1  | 0 | 0 | 0                                    | 1  | 0  | 0 | 0 |
| Myositis                  | 1                          | 0  | 1  | 0 | 0 | 0                                    | 0  | 0  | 0 | 0 |
| Pancreatitis              | 0                          | 1  | 3  | 0 | 0 | 0                                    | 0  | 1  | 0 | 0 |
| Pneumonitis               | 1                          | 7  | 3  | 0 | 0 | 1                                    | 4  | 7  | 2 | 1 |
| Rash acneiform            | 16                         | 1  | 0  | 0 | 0 | 11                                   | 1  | 0  | 0 | 0 |
| Rash maculo-papular       | 43                         | 7  | 4  | 0 | 0 | 44                                   | 14 | 0  | 0 | 0 |
| Seizure                   | 1                          | 0  | 1  | 0 | 0 | 0                                    | 1  | 0  | 0 | 0 |
| Serum amylase increased   | 1                          | 0  | 0  | 0 | 0 | 0                                    | 0  | 0  | 0 | 0 |

**Table S10: Representativeness of Trial Population**

| <b>Supplementary Table on the Representativeness of Study Participants on S1826</b> |                                                                                                                                                                                                                                                                                                                                                                                                                                                                                                                                                                                                                                                                                                                                                                                                                                                                                                                                                                                                                                                                                                                                                                                                                      |
|-------------------------------------------------------------------------------------|----------------------------------------------------------------------------------------------------------------------------------------------------------------------------------------------------------------------------------------------------------------------------------------------------------------------------------------------------------------------------------------------------------------------------------------------------------------------------------------------------------------------------------------------------------------------------------------------------------------------------------------------------------------------------------------------------------------------------------------------------------------------------------------------------------------------------------------------------------------------------------------------------------------------------------------------------------------------------------------------------------------------------------------------------------------------------------------------------------------------------------------------------------------------------------------------------------------------|
| Disease, problem, or condition under investigation                                  | Classic Hodgkin lymphoma (inclusive of all cHL histologies)                                                                                                                                                                                                                                                                                                                                                                                                                                                                                                                                                                                                                                                                                                                                                                                                                                                                                                                                                                                                                                                                                                                                                          |
| Special considerations related to sex                                               | Hodgkin lymphoma affects more males than females. Expected rates by sex: 2.9 per 100,000 males and 2.3 per 100,000 females per year. <sup>1</sup> In economically disadvantaged areas outside of North America boys < 15 years of age have a five-fold higher incidence of HL than girls.                                                                                                                                                                                                                                                                                                                                                                                                                                                                                                                                                                                                                                                                                                                                                                                                                                                                                                                            |
| Age                                                                                 | The hallmark of Hodgkin lymphoma epidemiology is its variation in occurrence by age at diagnosis. The median age of diagnosis is 39 years old. However, in the United States and North America a bimodal incidence is noted, with the first peak occurring from ages ~15-30 and a later peak occurring from ages ~65-80. Patients under the age of 20 years old account for 12.3% of new cHL cases, patients ages 20-34 account for 31% of cHL new diagnoses, and 20.2% of new cHL diagnoses are accounted for by patients ages 65 years and above.                                                                                                                                                                                                                                                                                                                                                                                                                                                                                                                                                                                                                                                                  |
| Race or ethnic group                                                                | The incidence of cHL in all races among men is 2.8 new cases per 100,000 persons and 2.3 new cases per 100,000 among women. The incidence rate of cHL is highest among non-Hispanic white persons, with incidence rates of 3 new cases per 100,000 persons. The incidence of cHL among Hispanic persons is 2 new cases per 100,000 persons. The incidence of cHL among non-Hispanic black patients is 2 new cases per 100,000 persons. <sup>1</sup>                                                                                                                                                                                                                                                                                                                                                                                                                                                                                                                                                                                                                                                                                                                                                                  |
| Geography                                                                           | The distribution of cHL and its histologic subtypes differs between economically developed settings compared to settings with depressed socioeconomic factors, and by the age of exposure to Epstein-Barr virus and the prevalence of HIV.                                                                                                                                                                                                                                                                                                                                                                                                                                                                                                                                                                                                                                                                                                                                                                                                                                                                                                                                                                           |
| <b>Overall representativeness of this trial (S1826)</b>                             | <p>The proportion of males and females enrolled on the present trial match the population incidence rates of classical Hodgkin lymphoma, with a predominance among male patients (trial participants 56% male and 44% female).</p> <p>The participants in the present trial also demonstrated the expected proportions of White, Black, American Indian, Asian, and Hispanic populations based on Hodgkin lymphoma incidence rates in the United States. In the current trial, 76% of enrolled patients identified as Non-Hispanic White, 12% were Black, 13% were Hispanic, and 3% were Asian. Among the 9% patients listed as “other” in <b>Table 1</b>, patients identified as Pacific Islander (n=2), Native American (n=3), multiracial (n=9), and unknown (n=81, 8%). Participants enrolled in this trial represent 256 National Cancer Institute National Clinical Trials Network institutions, including NCI Community Oncology Research Program sites, that are geographically diverse across the United States and Canada and serve patients from a wide range of demographics.</p> <p>Overall, S1826 was a demographically representative trial, representative of the North American cHL population.</p> |

**cHL = classic Hodgkin lymphoma; HIV = human immunodeficiency virus**

## References

1. Grambsch PM, Therneau TM. Proportional Hazards Tests and Diagnostics Based on Weighted Residuals. *Biometrika* 1994;81:515-26.
